# Supplementary material for: Electrospun single-phase spinel magnetic high entropy oxide nanoparticles via low-temperature ambient annealing
Source: Royal Society of Chemistry journal article supplement (doi:10.1039/d3na00090g), 2023-01-01
Supplement: d3na00090g1.pdf [file d3na00090g1.pdf]

Supporting Information

## Electrospun Single-Phase Spinel Magnetic High Entropy Oxide Nanoparticles via Low-Temperature Ambient Annealing

Xiao Han<sup>1</sup>, Dian Li<sup>2</sup>, Jingyi Zhou<sup>3</sup>, Yufeng Zheng<sup>2</sup>, Lingyan Kong<sup>3</sup>, Lin Li<sup>4</sup>, Feng Yan<sup>4,\*</sup>

<sup>1</sup>Department of Metallurgical and Materials Engineering, The University of Alabama, Tuscaloosa, AL 35487, USA

<sup>2</sup>Department of Chemical and Materials Engineering, University of Nevada Reno, Reno, NV 89557 USA

<sup>3</sup>Department of Human Nutrition and Hospitality Management, The University of Alabama, Tuscaloosa, AL 35487, USA

4. Materials Science Program, School for Engineering of Matter, Transport and Energy, Arizona State University, Tempe, AZ, 85287

**Supporting Table 1.** Solubility of nitrate salt precursors. (Reference: chemister.ru Database)

| Salt Precursors                   | Solubility Information                                                | Decomposition Temp, °C |
|-----------------------------------|-----------------------------------------------------------------------|------------------------|
| Fe(NO <sub>3</sub> ) <sub>3</sub> | Soluble in water, alcohol, acetone.                                   | 141                    |
| Co(NO <sub>3</sub> ) <sub>2</sub> | Soluble in water, alcohol, acetone and ammonia.                       | 224                    |
| Ni(NO <sub>3</sub> ) <sub>2</sub> | Soluble in ethanol, slightly soluble in acetone.                      | 298                    |
| Cr(NO <sub>3</sub> ) <sub>3</sub> | Soluble in water, acetone and ethanol.                                | 155                    |
| Cu(NO <sub>3</sub> ) <sub>2</sub> | Soluble in water, ethanol, ammonia.                                   | 175                    |
| Mg(NO <sub>3</sub> ) <sub>2</sub> | Soluble in water, acid and alkali, ethanol, acetone.                  | 435                    |
| Zn(NO <sub>3</sub> ) <sub>2</sub> | Soluble in water and alcohol.                                         | 244                    |
| Mn(NO <sub>3</sub> ) <sub>2</sub> | Soluble in water, ethanol, acetonitrile, tetrahydrofuran and ammonia. | 180                    |

\* Corresponding Author: [fengyan@asu.edu](mailto:fengyan@asu.edu)

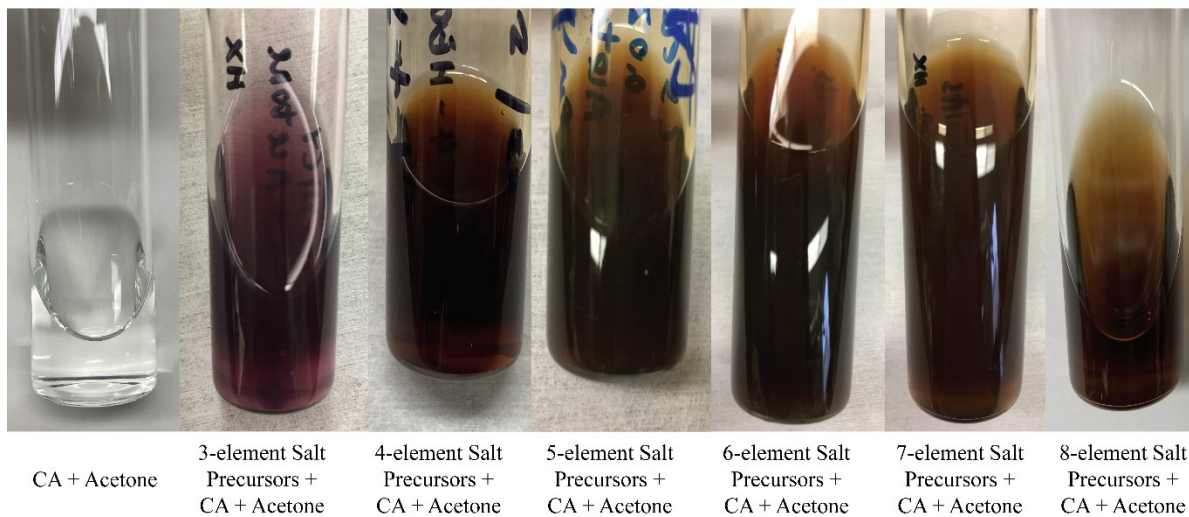

**Supporting Figure 1.** Digital photographs of CA solution and salt precursor solution including from 3 metal elements to 8 metal elements.

**Supporting Table 2.** Summary of calculated entropy of HEO NPs including from 3 metal elements to 8 mental elements.

| Nanoparticles      | Entropy |
|--------------------|---------|
| CoNiCr-O           | 1.187R  |
| FeCoNiCr-O         | 1.247R  |
| FeCoNiCrCu-O       | 1.432R  |
| FeCoNiCrCuMg-O     | 1.662R  |
| FeCoNiCrCuMgZn-O   | 1.823R  |
| FeCoNiCrCuMgZnMn-O | 2.012R  |

Simple-lattice model of configurational entropy in solid-solution model:

$$S_{SS}^{config} = -R \sum_i X_i \ln(X_i)$$

where  $X_i$  is the mole fraction of each element.

Simple definition:

$$S_{SS}^{config} = -R \ln(n)$$

where n is the number of components in the system.

$X_i$  in the following calculations is from the EDS data.

3-HEO:

$$\begin{aligned} S_{SS}^{config} &= -R \sum_i X_i \ln(X_i) = -R[0.1553 \times \ln(0.1553) + 0.1496 \times \ln(0.1496) + 0.1483 \times \ln(0.1483)] \\ &= 1.187R \end{aligned}$$

4-HEO:

$$\begin{aligned} S_{SS}^{config} &= -R \sum_i X_i \ln(X_i) = -R[0.1211 \times \ln(0.1211) + 0.1228 \times \ln(0.1228) + 0.1193 \times \ln(0.1193) + 0.1193 \times \ln(0.1193)] \\ &= 1.247R \end{aligned}$$

5-HEO:

$$S_{SS}^{config}$$

$$\begin{aligned} &= -R \sum_i X_i \ln(X_i) = -R[0.0636 \times \ln(0.0636) + 0.1027 \times \ln(0.1027) + 0.1057 \times \ln \\ &= 1.432R \end{aligned}$$

6-HEO:

$$S_{SS}^{config}$$

$$\begin{aligned} &= -R \sum_i X_i \ln(X_i) = -R[0.0883 \times \ln(0.0883) + 0.0794 \times \ln(0.0794) + 0.0894 \times \ln \\ &= 1.662R \end{aligned}$$

7-HEO:

$$S_{SS}^{config}$$

$$\begin{aligned} &= -R \sum_i X_i \ln(X_i) = -R[0.0819 \times \ln(0.0819) + 0.0778 \times \ln(0.0778) + 0.0882 \times \ln \\ &\quad + 0.0853 \times \ln(0.0853) + 0.4068 \times \ln(0.4068) \\ &= 1.823R \end{aligned}$$

8-HEO:

$$S_{SS}^{config}$$

$$\begin{aligned} &= -R \sum_i X_i \ln(X_i) = -R[0.096 \times \ln(0.096) + 0.088 \times \ln(0.088) + 0.088 \times \ln(0.088) \\ &\quad + 0.065 \times \ln(0.065) + 0.093 \times \ln(0.093) + 0.337 \times \ln(0.337) \\ &= 2.012R \end{aligned}$$

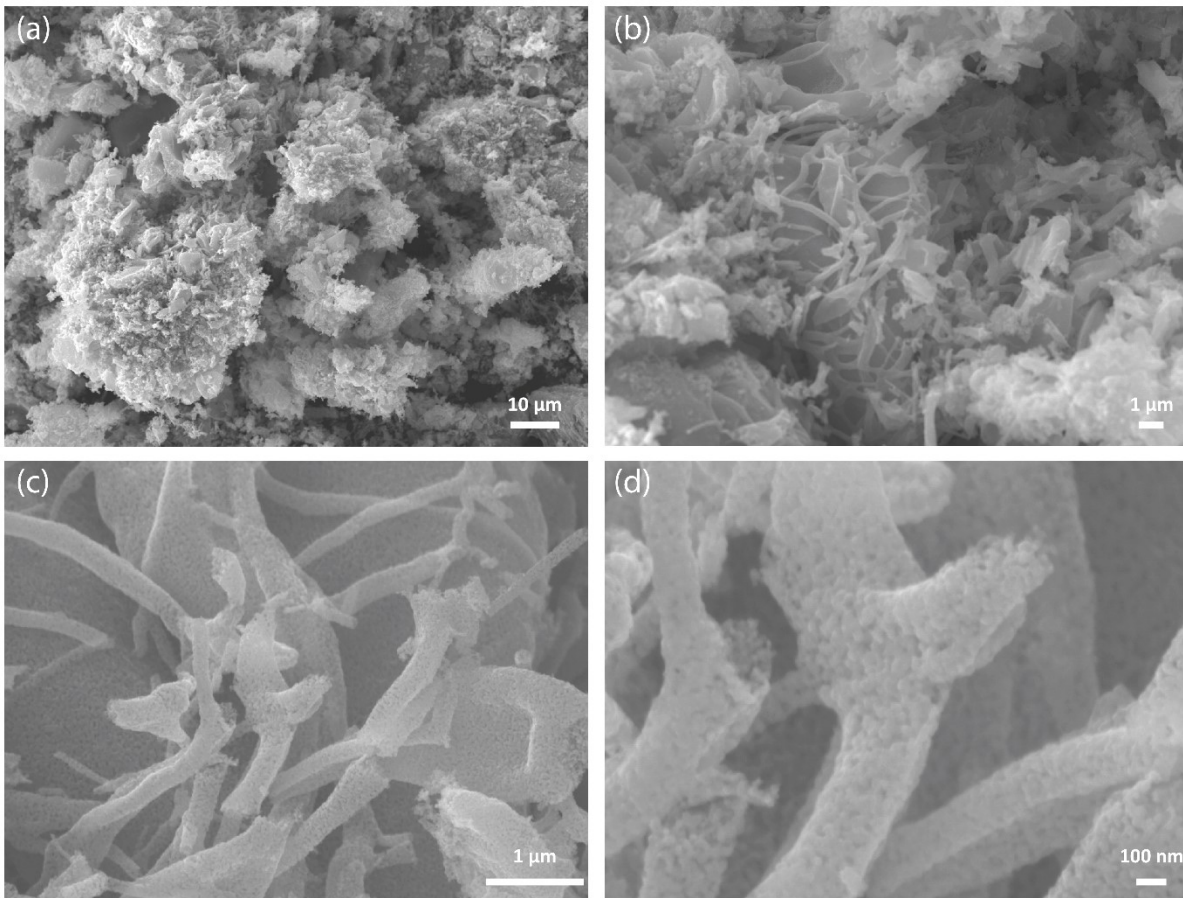

***Supporting Figure 2.*** SEM of 3-HEO NPs.

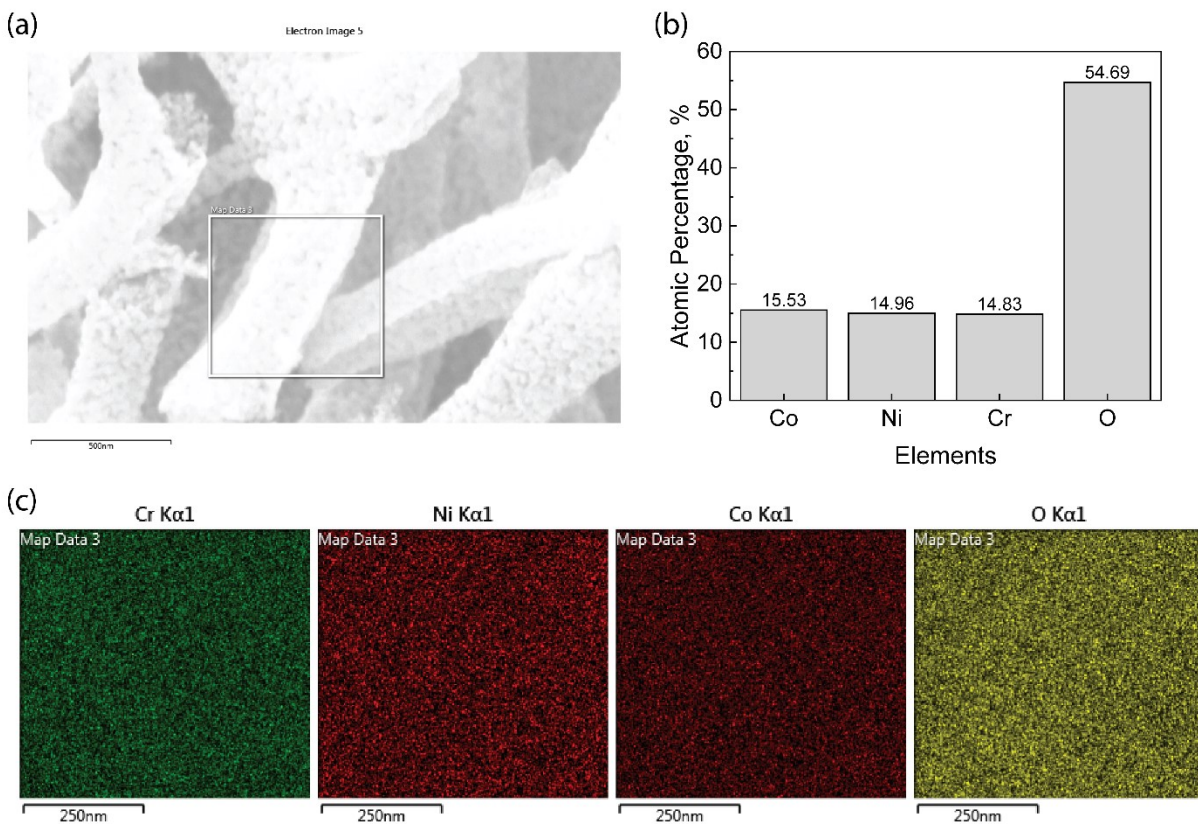

**Supporting Figure 3.** EDS of 3-HEO NPs. (a). EDS mapping of 3-HEO NPs. (b). Elemental composition of 3-HEO NPs. (c). EDS elemental mapping of three individual metal elements and oxygen.

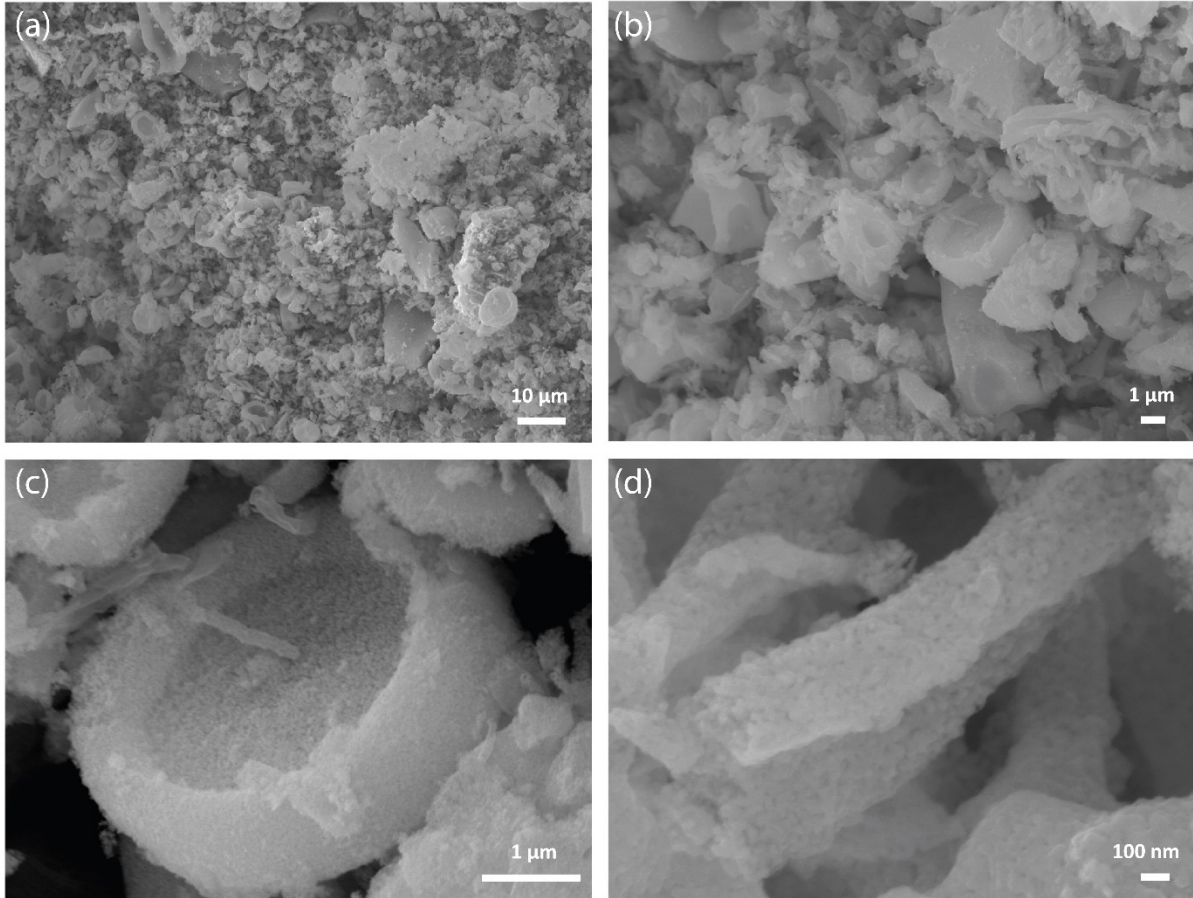

*Supporting Figure 4.* SEM of 4-HEO NPs.

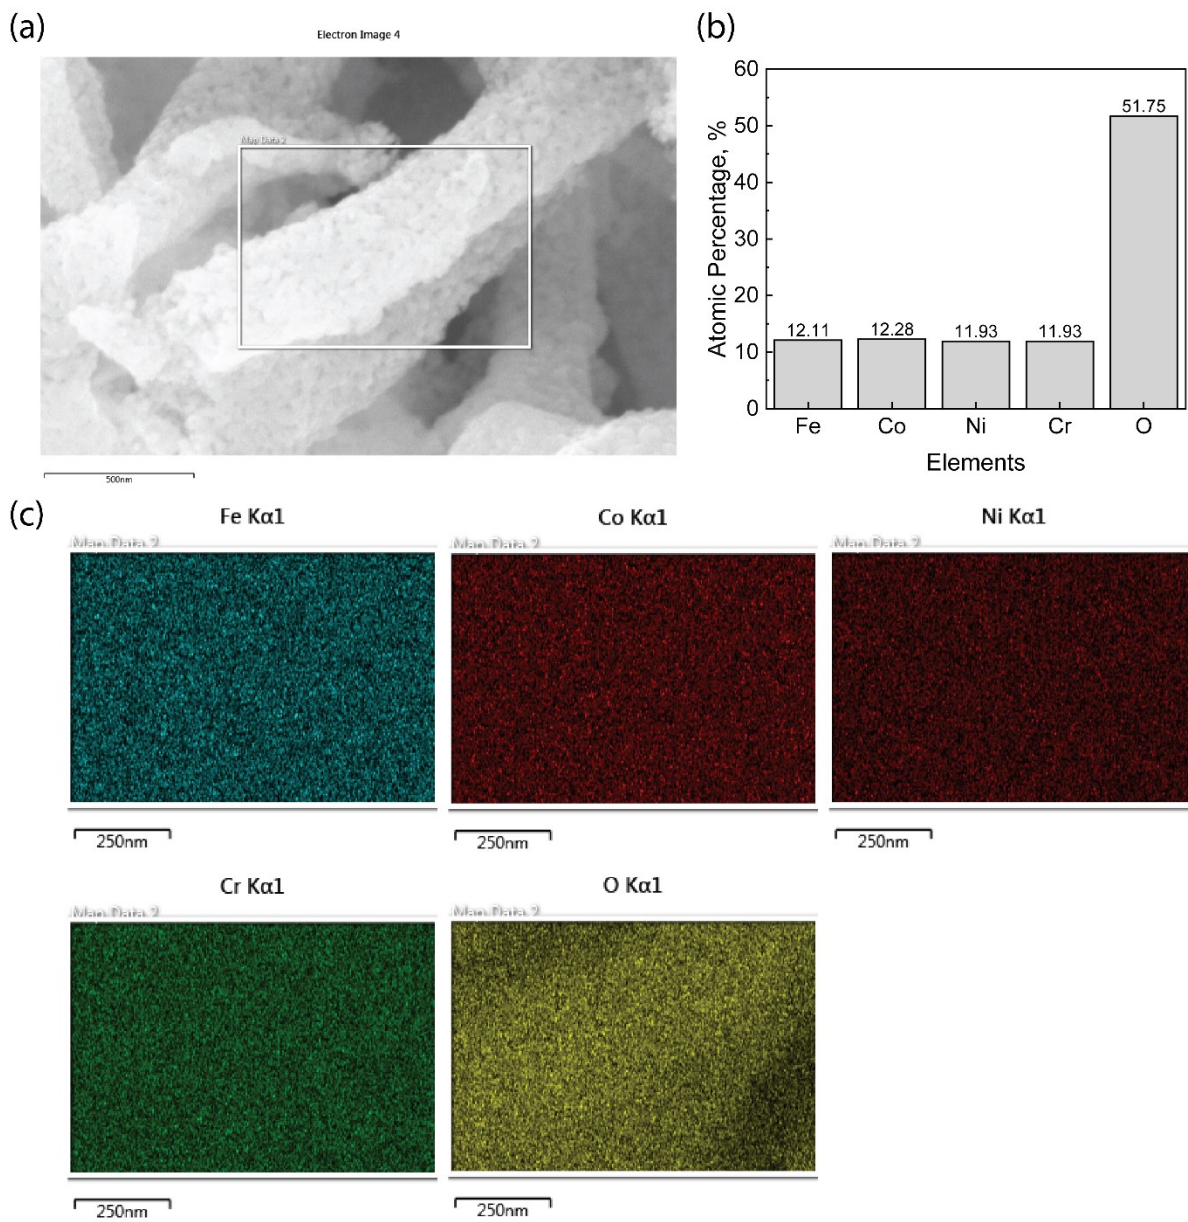

**Supporting Figure 5.** EDS of 4-HEO NPs. (a). EDS mapping of 4-HEO NPs. (b). Elemental composition of 4-HEO NPs. (c). EDS elemental mapping of four individual metal elements and oxygen.



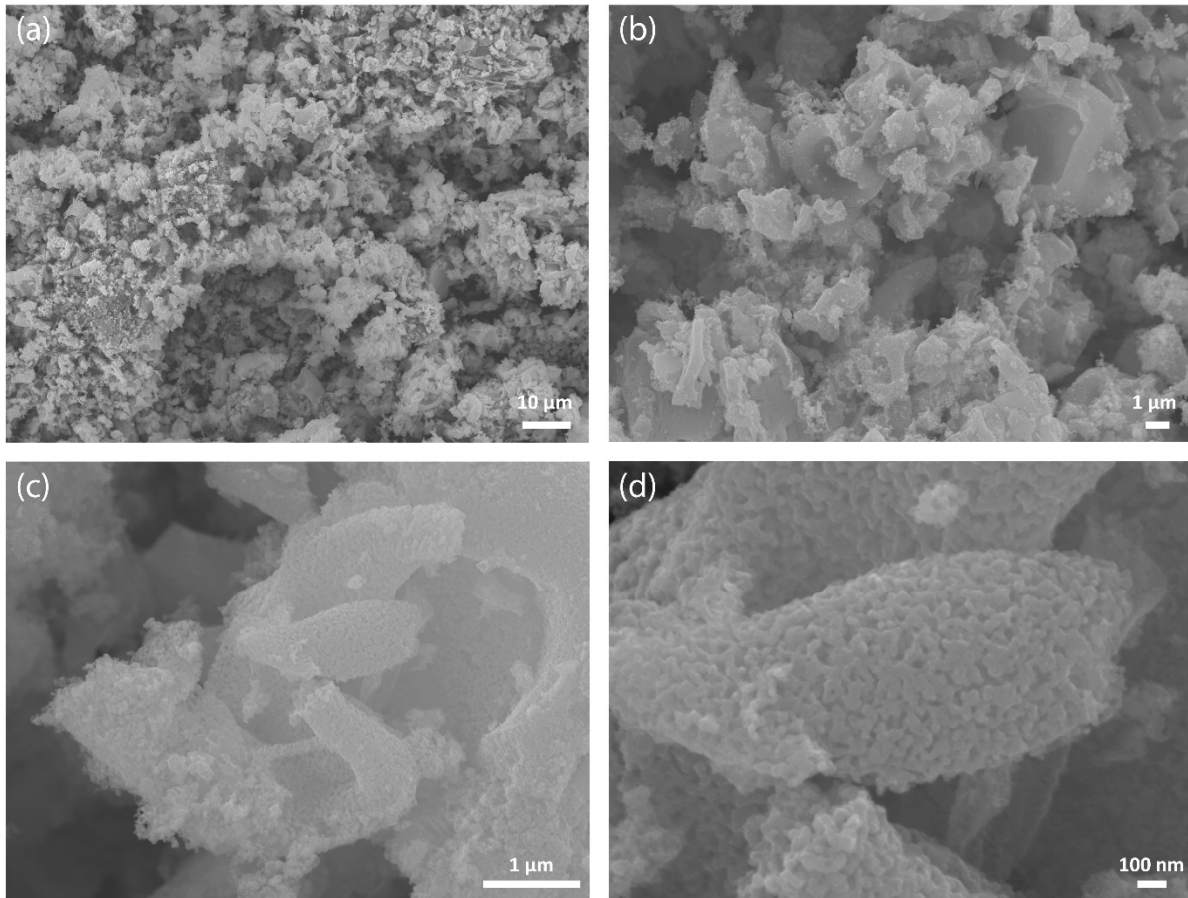

**Supporting Figure 6.** SEM of 5-HEO NPs.

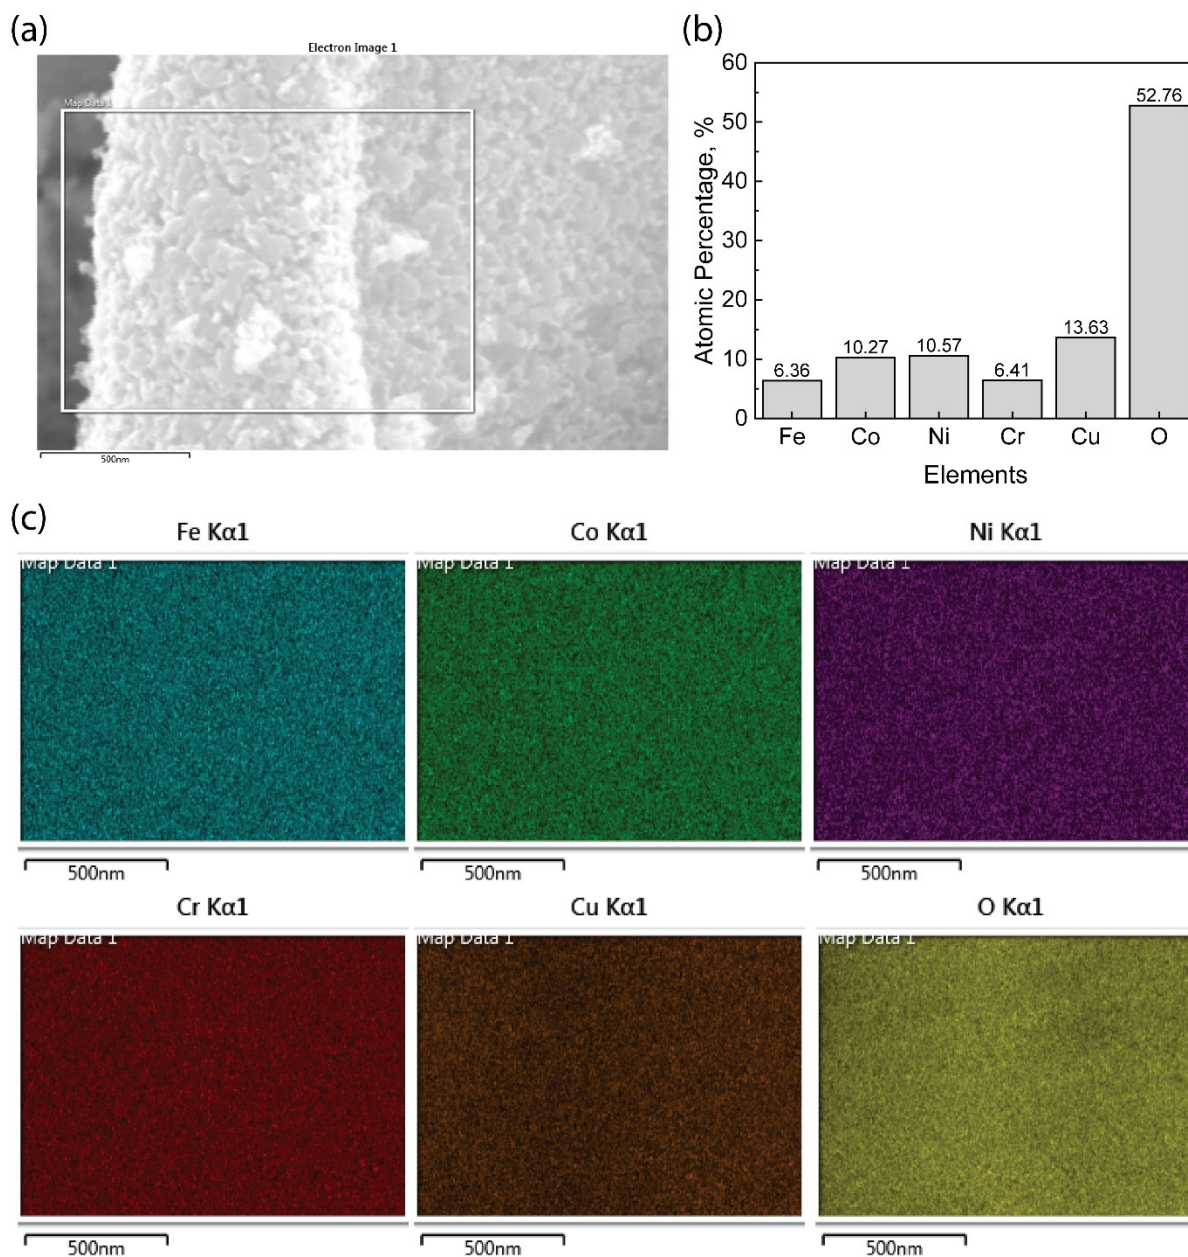

**Supporting Figure 7.** EDS of 5-HEO NPs. (a). EDS mapping of 5-HEO NPs. (b). Elemental composition of 5-HEO NPs. (c). EDS elemental mapping of all five individual metal elements and oxygen.

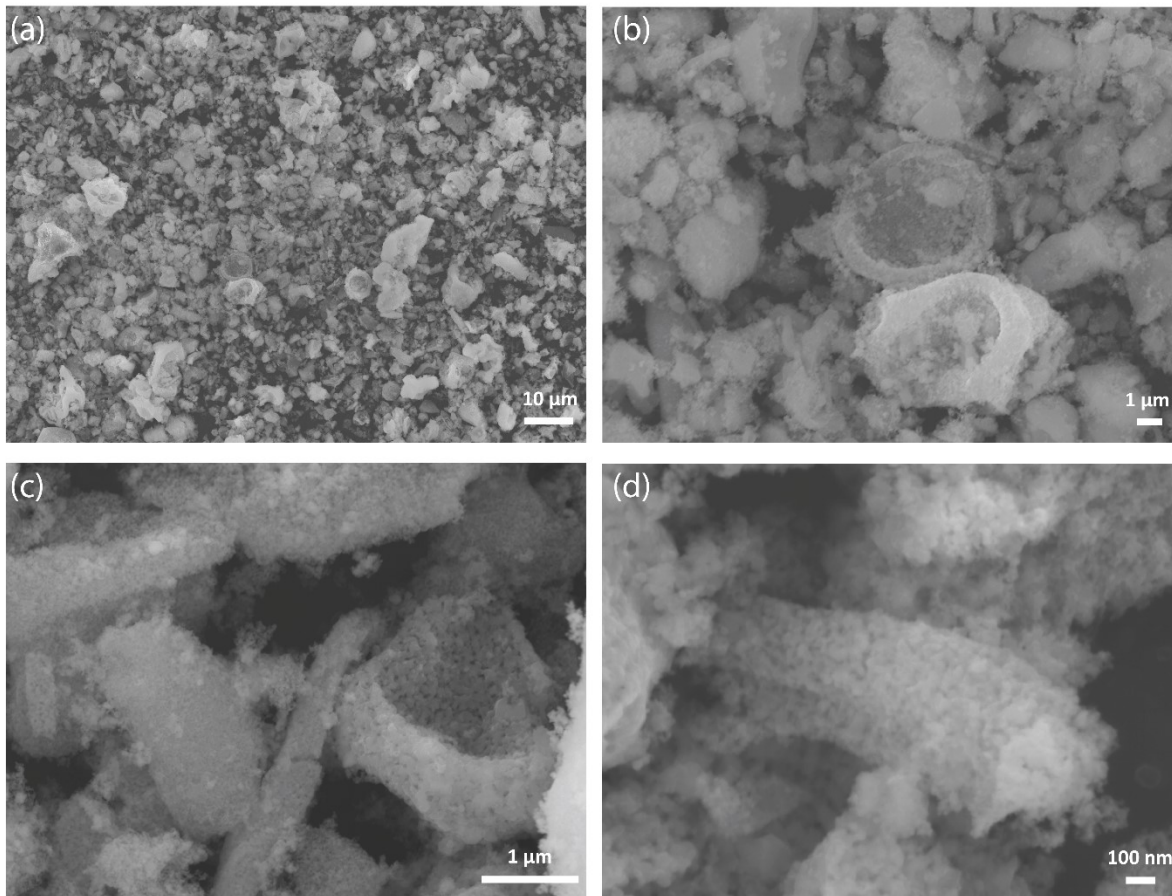

**Supporting Figure 8.** SEM of 6-HEO NPs.

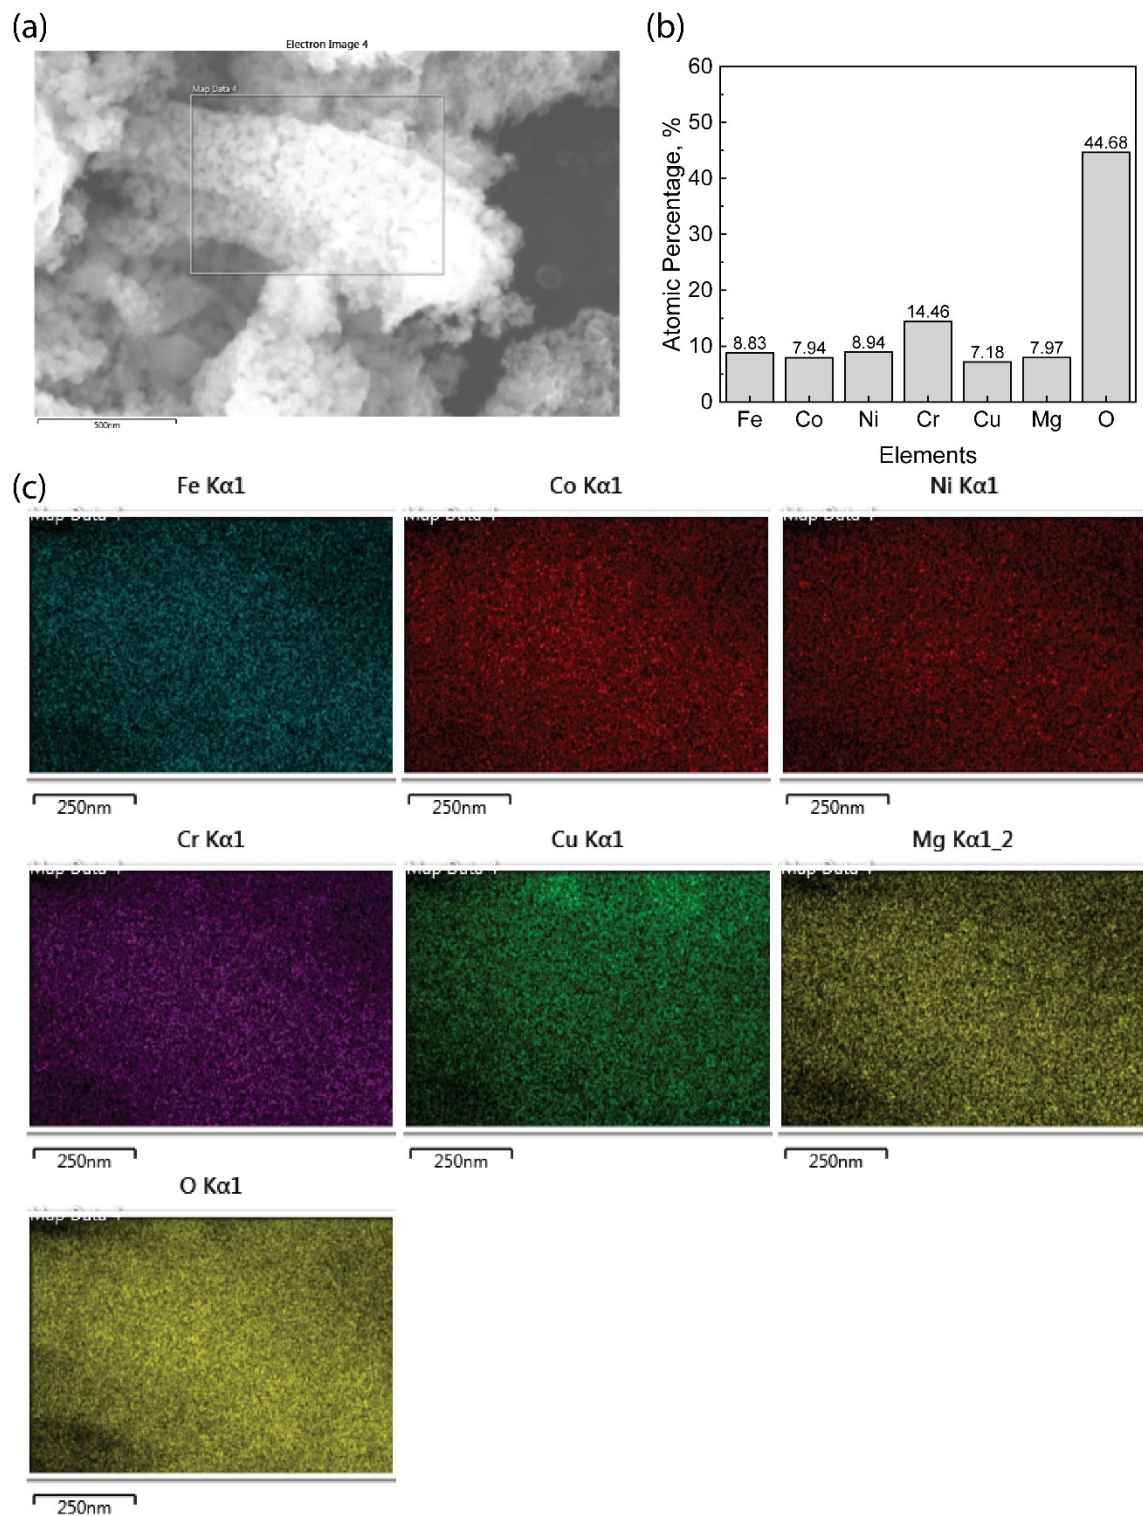

**Supporting Figure 9.** EDS of 6-HEO NPs. (a). EDS mapping of 6-HEO NPs. (b). Elemental composition of 6-HEO NPs. (c). EDS elemental mapping of all six individual metal elements and oxygen.

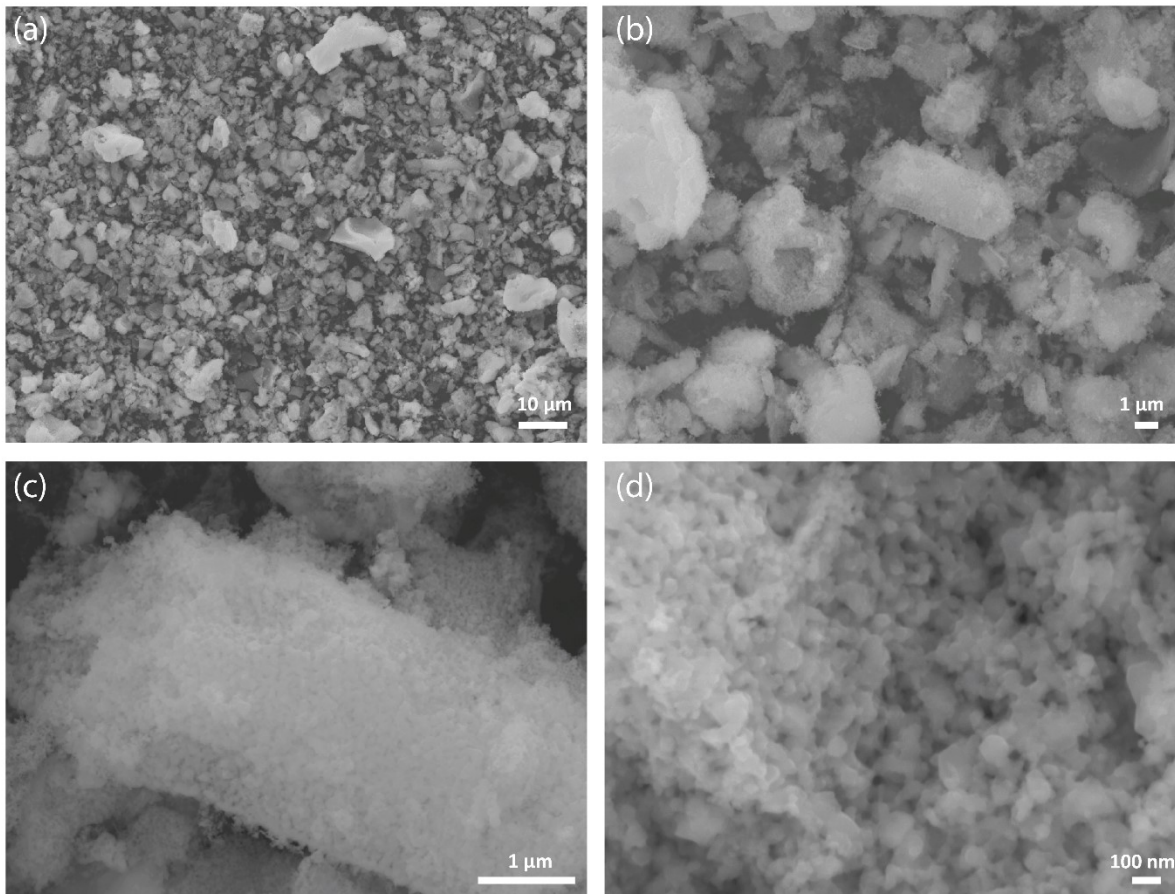

***Supporting Figure 10.*** SEM of 7-HEO NPs.

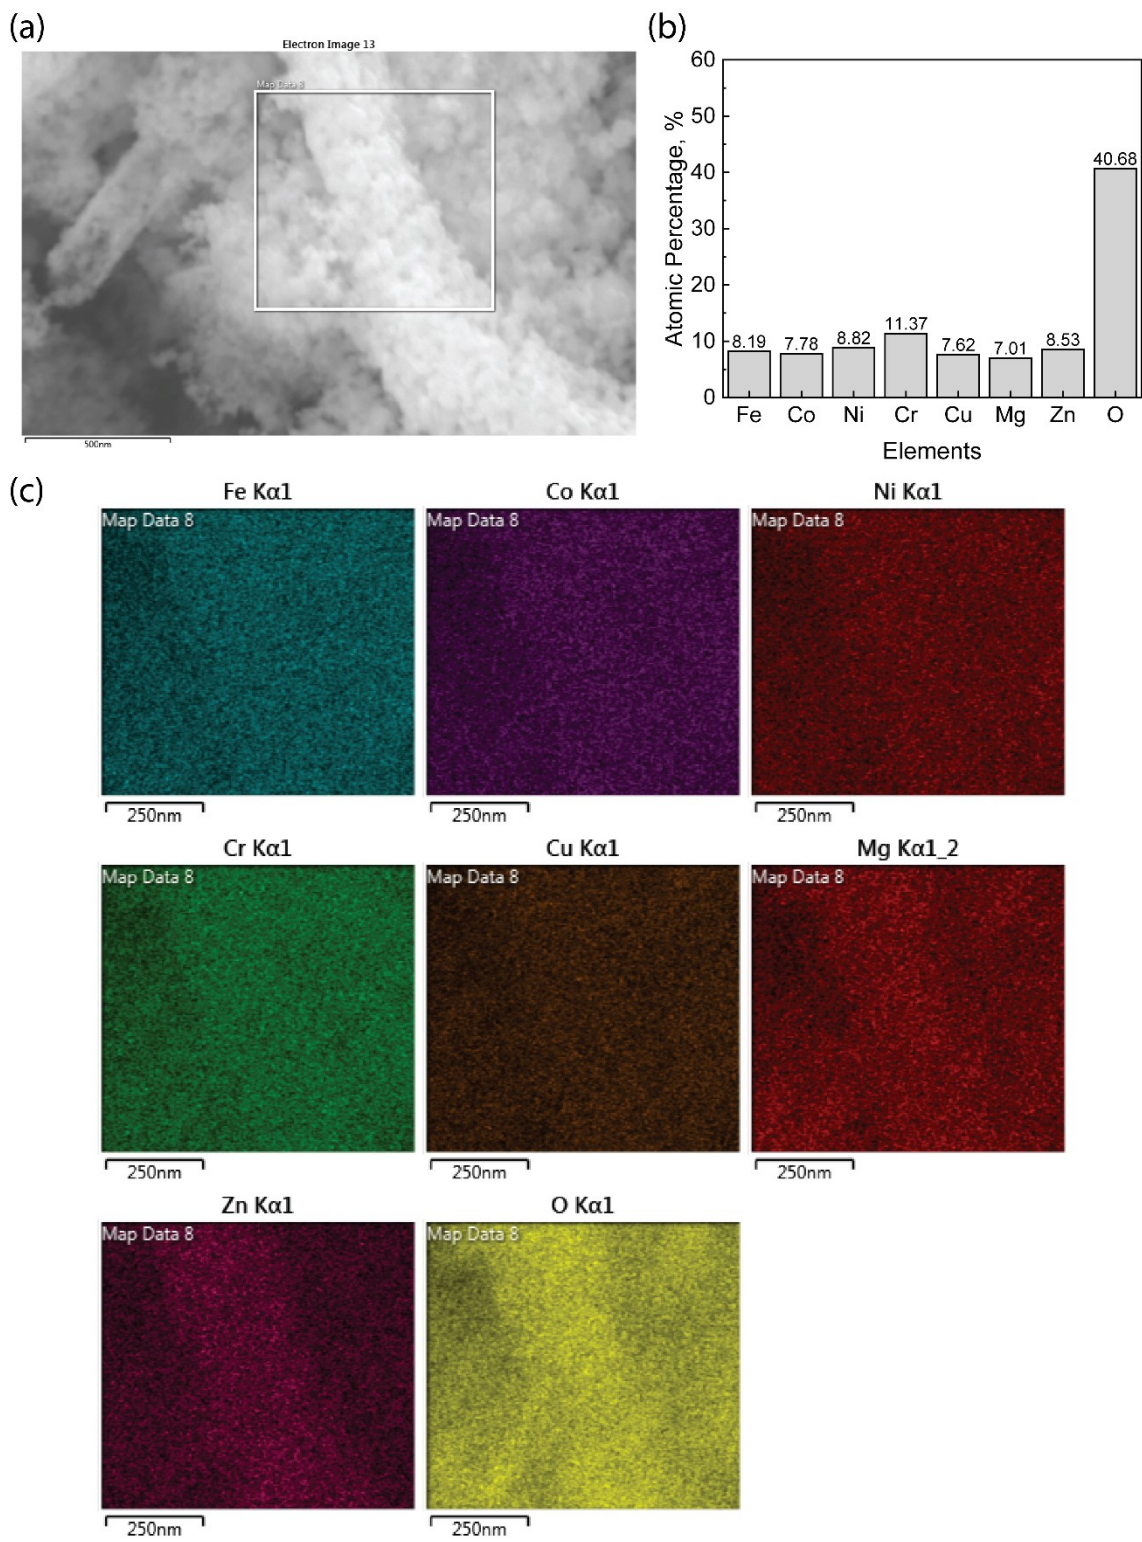

**Supporting Figure 11.** EDS of 7-HEO NPs. (a). EDS mapping of 7-HEO NPs. (b). Elemental composition of 7-HEO NPs. (c). EDS elemental mapping of all seven individual metal elements and oxygen.

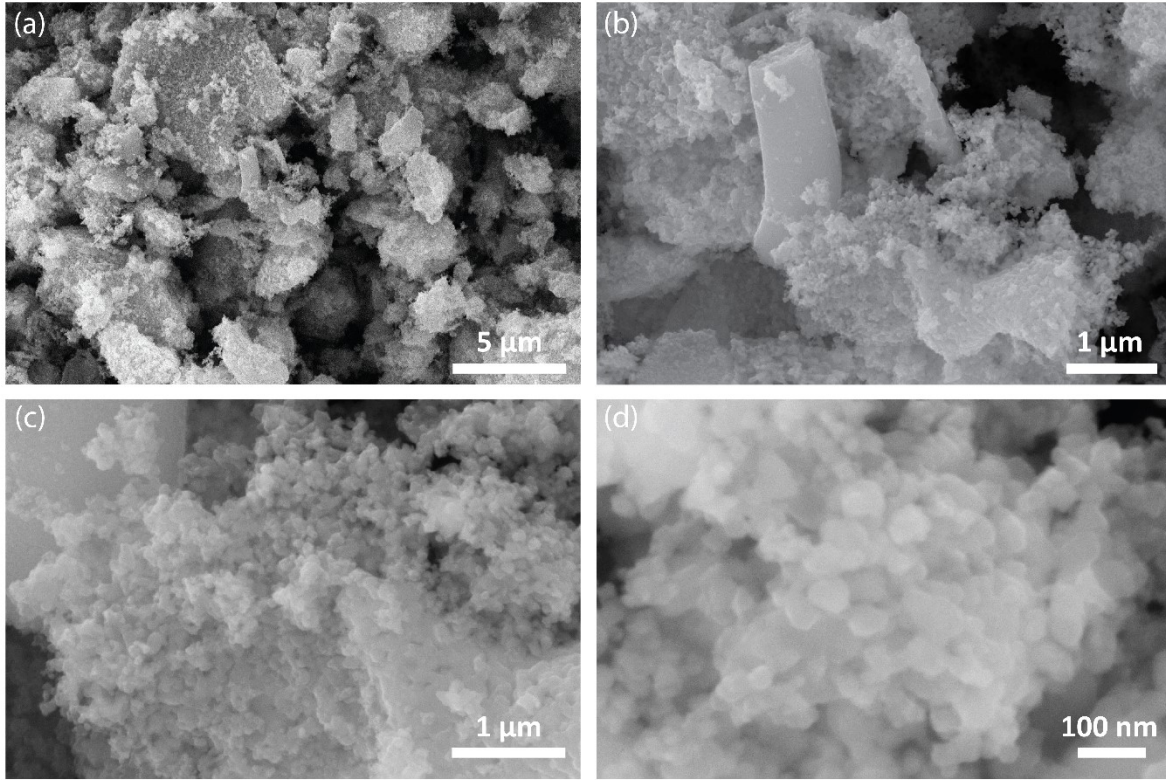

*Supporting Figure 12.* SEM of 8-HEO NPs.

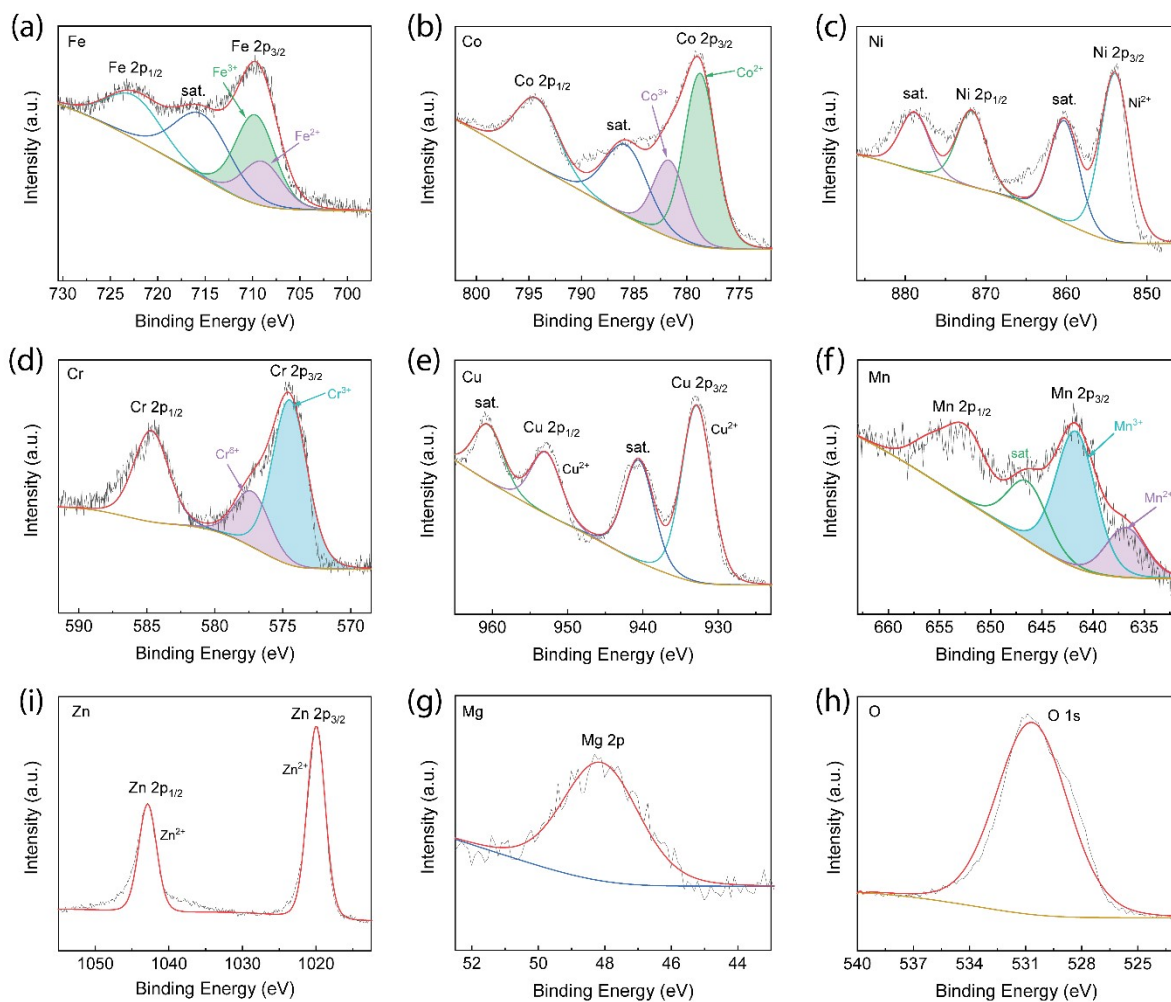

**Supporting Figure 13.** XPS analysis of 8-HEO NPs.
